# Supplementary material for: Advanced REACH Tool: A Bayesian Model for Occupational Exposure Assessment
Source: PubMed Central journal article supplement — Ann Occup Hyg. 2014 Mar 24;58(5):551–65. doi: 10.1093/annhyg/meu017 (PMC4053932; doi:10.1093/annhyg/meu017), 2014-03-24
Supplement: supp_meu017_Supplement_one___copper_pyrithione.pdf [file supp_meu017_Supplement_one___copper_pyrithione.pdf]

## ART REPORT – Antifouling paints – 13-Nov-12

Exposure to Copper pyrithione. Example 2 in Advanced REACH Tool (ART): A Bayesian model for exposure assessment

### Chemical details

|          |                   |
|----------|-------------------|
| Chemical | Copper pyrithione |
| CAS No.  | 14915-37-8        |

### Scenario details

|                           |     |
|---------------------------|-----|
| Number of activities      | 1   |
| Total duration (mins)     | 480 |
| Nonexposure period (mins) | 0   |

### Metadata

|                  |                      |
|------------------|----------------------|
| ART version      | 1.5                  |
| Creator          | Suzanne.spaan@tno.nl |
| Date created     | 13-Nov-12            |
| Date last edited | 13-Nov-12            |

## Details for Activity Spraying

Emission sources:      Near field    
                              Far field

Duration (mins):                      480

### Near-field exposure

#### *Operational Conditions*

##### *Substance emission potential*

|                               |                                                                  |
|-------------------------------|------------------------------------------------------------------|
| Substance product type        | Powders dissolved in a liquid or incorporated in a liquid matrix |
| Liquid matrix weight fraction | 0.02                                                             |
| Viscosity                     | Medium                                                           |

##### *Activity emission potential*

|                 |                                              |
|-----------------|----------------------------------------------|
| Activity class  | Surface spraying of liquids                  |
| Situation       | Moderate application rate (0.3 - 3 l/minute) |
| Spray direction | In any direction (including upwards)         |
| Spray technique | Spraying with no or low compressed air use   |

##### *Surface contamination*

|                                            |     |
|--------------------------------------------|-----|
| Process fully enclosed?                    | No  |
| Effective housekeeping practices in place? | No  |
| General housekeeping practices in place?   | Yes |

##### *Dispersion*

|           |                     |
|-----------|---------------------|
| Work area | Indoors             |
| Room size | 1000 m <sup>3</sup> |

#### *Risk Management Measures*

##### *Localised controls*

|           |                                          |
|-----------|------------------------------------------|
| Primary   | No localized controls (0.00 % reduction) |
| Secondary | No localized controls (0.00 % reduction) |

##### *Dispersion*

|                  |                                              |
|------------------|----------------------------------------------|
| Ventilation rate | Mechanical ventilation giving at least 1 ACH |
|------------------|----------------------------------------------|

## Predicted exposure levels

ART predicts air concentrations in a worker's personal breathing zone outside of any Respiratory Protection Equipment (RPE). The use of RPE must be considered separately.

### Mechanistic model results

The predicted 50th percentile full-shift exposure is 0.13 mg/m<sup>3</sup>.

The 90% confidence interval is 0.022 mg/m<sup>3</sup> to 0.74 mg/m<sup>3</sup>.

### Bayesian model results

| Data source                             | Proj. ref.                   | No. of sites | No. of workers | No. of records |
|-----------------------------------------|------------------------------|--------------|----------------|----------------|
| Spraying operators of antifouling paint | HSE guidance document EH74/3 | 11           | 21             | 21             |
| Antifouling spraying                    | Hughson et. al. 2004         | 1            | 4              | 4              |
|                                         | Totals                       | 12           | 25             | 25             |

The predicted 50th percentile full-shift exposure is 0.062 mg/m<sup>3</sup>.

The 90% confidence interval is 0.035 mg/m<sup>3</sup> to 0.11 mg/m<sup>3</sup>.
