# Supplementary material for: Advanced REACH Tool: A Bayesian Model for Occupational Exposure Assessment
Source: PubMed Central journal article supplement — Ann Occup Hyg. 2014 Mar 24;58(5):551–65. doi: 10.1093/annhyg/meu017 (PMC4053932; doi:10.1093/annhyg/meu017), 2014-03-24
Supplement: supp_meu017_Supplement_two___ethyl_acetate.pdf [file supp_meu017_Supplement_two___ethyl_acetate.pdf]

# ART REPORT – Shoe repair – 14-Nov-12

Exposure to Ethyl Acetate. Example 3 in Advanced REACH Tool (ART): A Bayesian model for exposure assessment

## Chemical details

|          |               |
|----------|---------------|
| Chemical | Ethyl acetate |
| CAS No.  | 141-78-6      |

## Scenario details

|                           |     |
|---------------------------|-----|
| Number of activities      | 1   |
| Total duration (mins)     | 480 |
| Nonexposure period (mins) | 0   |

## Metadata

|                  |                      |
|------------------|----------------------|
| ART version      | 1.5                  |
| Creator          | Suzanne.spaan@tno.nl |
| Date created     | 14-Nov-12            |
| Date last edited | 14-Nov-12            |

## Details for Activity Gluing

Emission sources:      Near field ✓  
                                 Far field

Duration (mins):                      480

### Near-field exposure

#### *Operational Conditions*

##### *Substance emission potential*

|                        |                  |
|------------------------|------------------|
| Substance product type | Liquids          |
| Process temperature    | Room temperature |
| Vapour pressure        | 9700 Pa          |
| Liquid mole fraction   | 0.15             |
| Activity coefficient   | 1                |

##### *Activity emission potential*

|                |                                                                                 |
|----------------|---------------------------------------------------------------------------------|
| Activity class | Spreading of liquid products                                                    |
| Situation      | Spreading of liquids at surfaces or work pieces 0.3 - 1.0 m <sup>2</sup> / hour |

##### *Surface contamination*

|                                            |    |
|--------------------------------------------|----|
| Process fully enclosed?                    | No |
| Effective housekeeping practices in place? | No |
| General housekeeping practices in place?   | No |

##### *Dispersion*

|           |                    |
|-----------|--------------------|
| Work area | Indoors            |
| Room size | 300 m <sup>3</sup> |

#### *Risk Management Measures*

##### *Localised controls*

|           |                                          |
|-----------|------------------------------------------|
| Primary   | Fixed capturing hood (90.00 % reduction) |
| Secondary | No localized controls (0.00 % reduction) |

##### *Dispersion*

|                  |                                                       |
|------------------|-------------------------------------------------------|
| Ventilation rate | No restriction on general ventilation characteristics |
|------------------|-------------------------------------------------------|

## Predicted exposure levels

ART predicts air concentrations in a worker's personal breathing zone outside of any Respiratory Protection Equipment (RPE). The use of RPE must be considered separately.

### Mechanistic model results

The predicted 50th percentile full-shift exposure is 17 mg/m<sup>3</sup>.

The 90% confidence interval is 3.5 mg/m<sup>3</sup> to 84 mg/m<sup>3</sup>.
